# Supplementary material
Source: Springer Nature journal article supplement (https://www.springermedizin.de/resource/supplementary/13041_2011_124_MOESM5_ESM.pdf/25657566)

# HTR1A C/C (-1019)/Normal

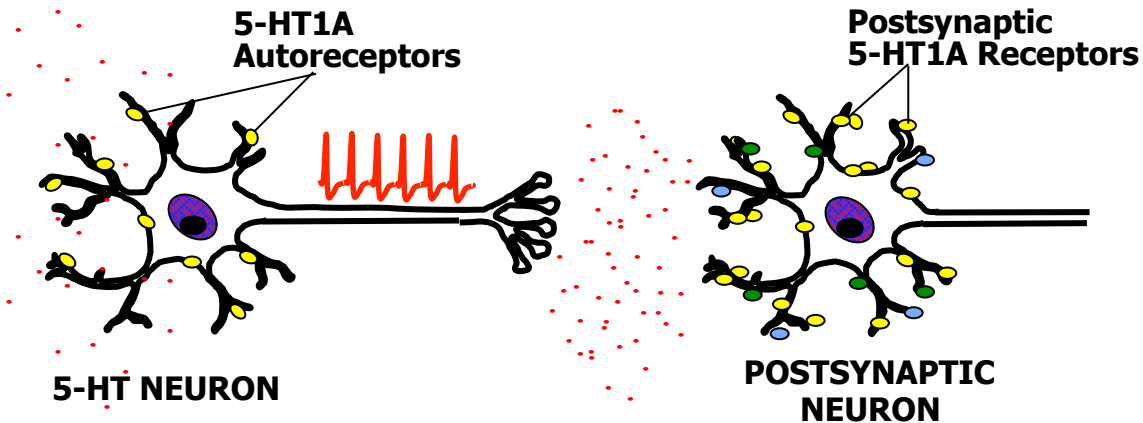

# HTR1A G/G (-1019)/Depressed

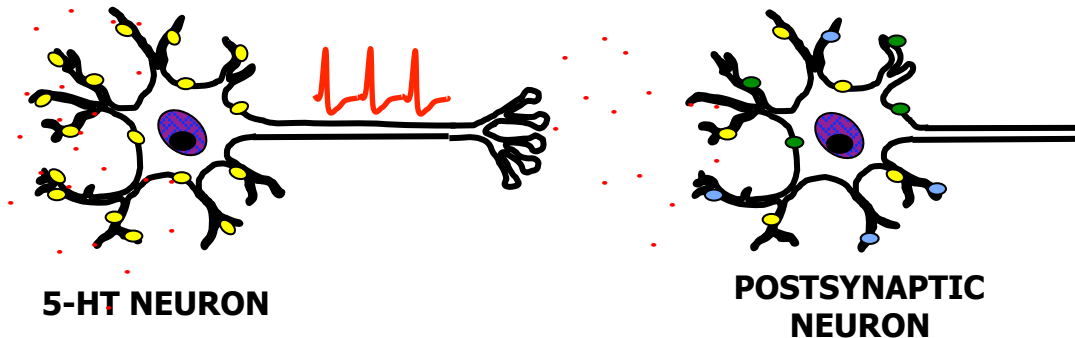

Supplement: MOESM5 [file 25657566]
